# Supplementary material for: Detection of diethyl chlorophosphate using a composite optical waveguide sensor
Source: Royal Society of Chemistry journal article supplement (doi:10.1039/c8ay02214c), 2019-01-01
Supplement: c8ay02214c1.pdf [file c8ay02214c1.pdf]

Electronic Supplementary Information

**Detection of diethyl chlorophosphate by composite optical waveguide sensor**

Bin Du,<sup>a</sup> Zhaoyang Tong,<sup>\*a</sup> Xihui Mu,<sup>a</sup> Shuai Liu,<sup>a</sup> Jianjie Xu,<sup>a</sup> Zhiwei Liu,<sup>a</sup> Zhimei Qi<sup>b</sup> and Zhijun Ding<sup>c</sup>

<sup>a</sup> State Key Laboratory of NBC Protection for Civilian, Beijing 102205, China.

<sup>b</sup> State Key Laboratory of Transducer Technology, Institute of Electronics,  
Chinese Academy of Sciences, Beijing 100190, China

<sup>c</sup> Research Institute of Chemical Defense, Beijing 102205, China

Corresponding Author:

E-mail: [billzytong@126.com](mailto:billzytong@126.com)

Synthesis of Rhodamine B hydrazide (RbH):

In a three-neck flask (100 mL), 1.2 g of rhodamine B was dissolved in 30 mL ethanol (30 mL), and then 5 mL hydrazine hydrate was added. The reaction mixture was refluxed for 2 h and then cooled to room temperature. The remaining ethanol was quickly evaporated by a vacuum rotary evaporator and then 60 mL hydrochloric acid (1 mol/L) was added in to the mixture. After that, 70 mL sodium hydroxide solution (1 mol/L) was added to the mixture, and the precipitation could be observed soon after the sodium hydroxide solution was added. After filtration under reduced pressure, the solid was washed with water and dried to afford the pure product as a pale pink powder solid (yield 40%).

<sup>1</sup>H NMR (600 MHz, Chloroform-*d*)  $\delta$  7.96 – 7.91 (m, 1H), 7.47 – 7.42 (m, 2H), 7.13 – 7.08 (m, 1H), 6.46 (d,  $J$  = 8.8 Hz, 2H), 6.42 (d,  $J$  = 2.6 Hz, 2H), 6.29 (dd,  $J$  = 8.9, 2.6 Hz, 2H), 3.61 (s, 2H), 3.34 (q,  $J$  = 7.1 Hz, 8H), 1.17 (t,  $J$  = 7.0 Hz, 12H). <sup>13</sup>C NMR (151 MHz, CDCl<sub>3</sub>)  $\delta$  166.15, 153.85, 151.55, 148.88, 132.56, 132.51, 130.03, 128.19, 128.12, 128.10, 128.07, 127.70, 123.83, 123.00, 109.97, 108.14, 108.03, 104.54, 98.50, 97.96, 65.93, 49.45, 44.50, 44.38, 38.29, 17.68, 14.76, 12.63. ESI-MS  $m/z$  calcd. for C<sub>28</sub>H<sub>32</sub>N<sub>4</sub>O<sub>2</sub>: 456.2, found: [M+H]<sup>+</sup> 457.2.

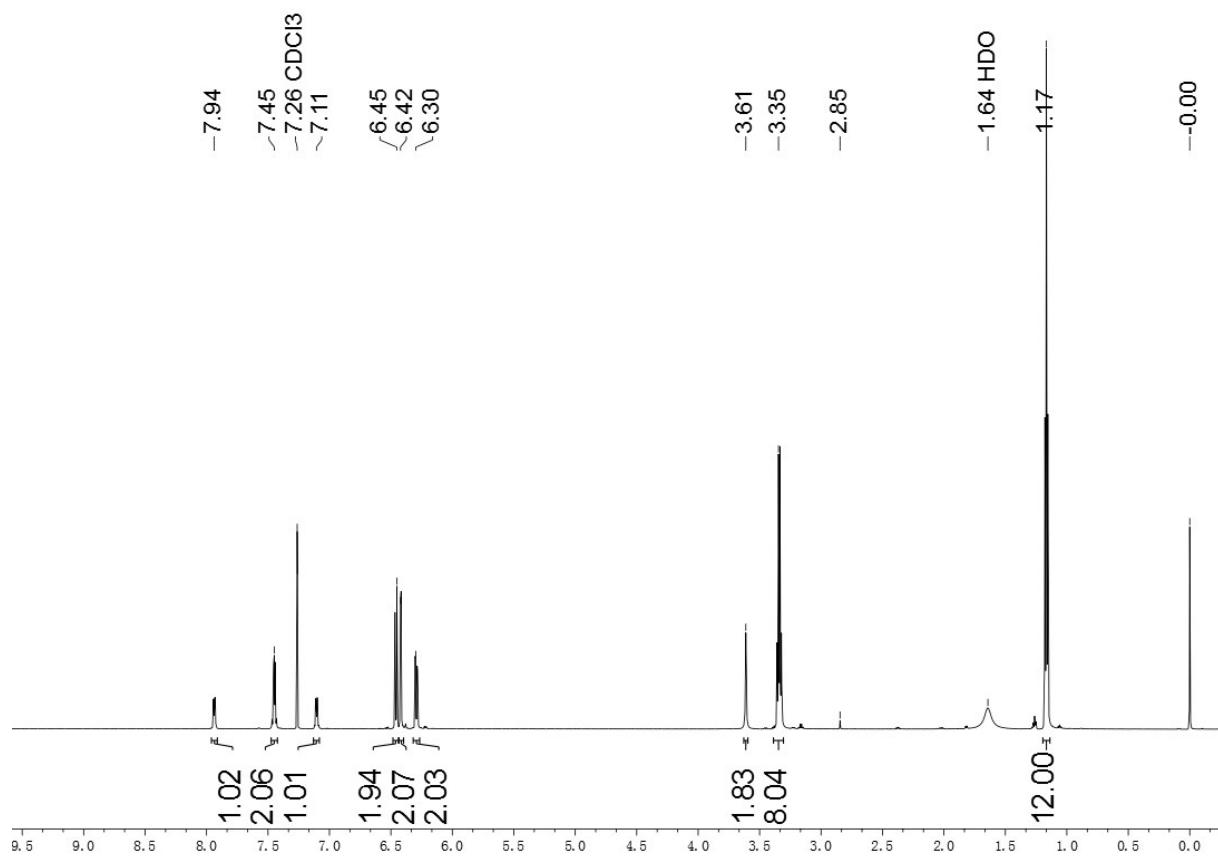

Fig. S1 <sup>1</sup>H NMR spectrum of RbH in CDCl<sub>3</sub>.

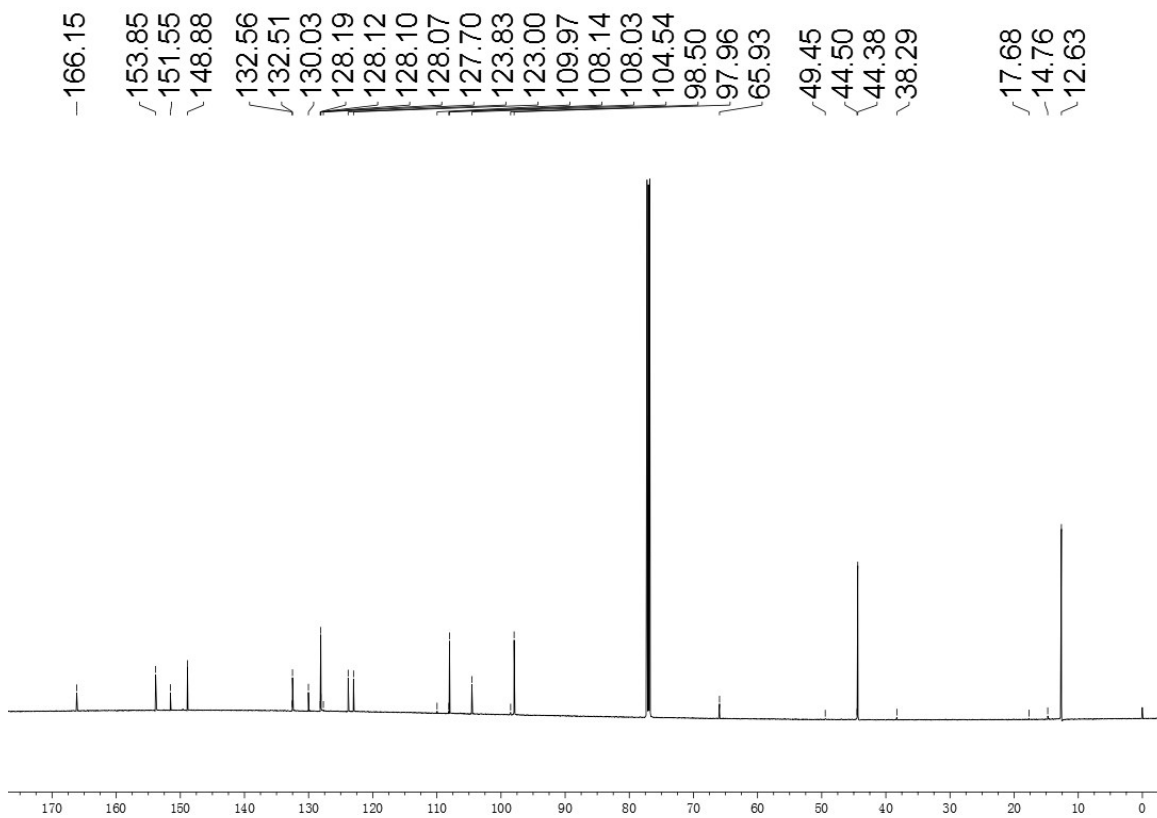

Fig. S2 <sup>13</sup>C NMR spectrum of RbH in CDCl<sub>3</sub>.

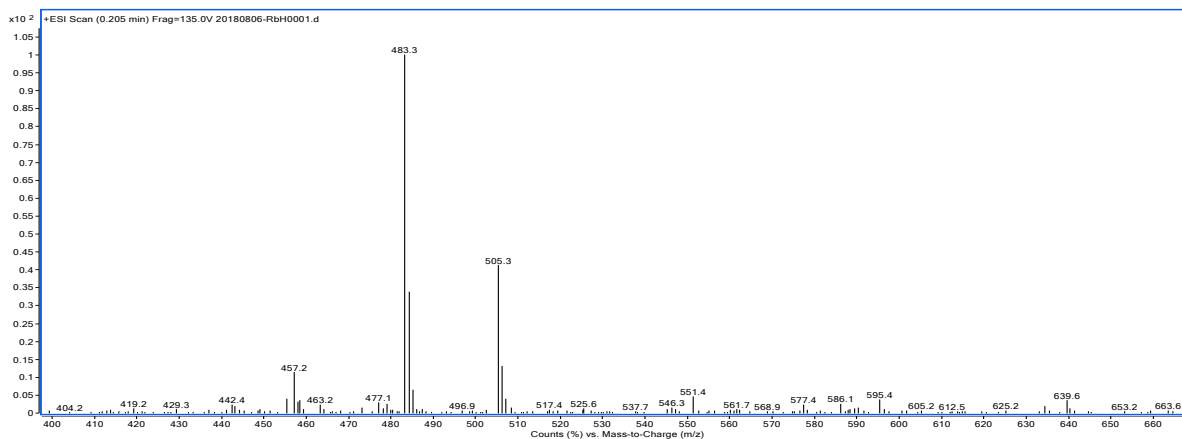

Fig. S3 Mass spectrum of RbH;  $m/z$ : 457.2 [M+H]<sup>+</sup>.

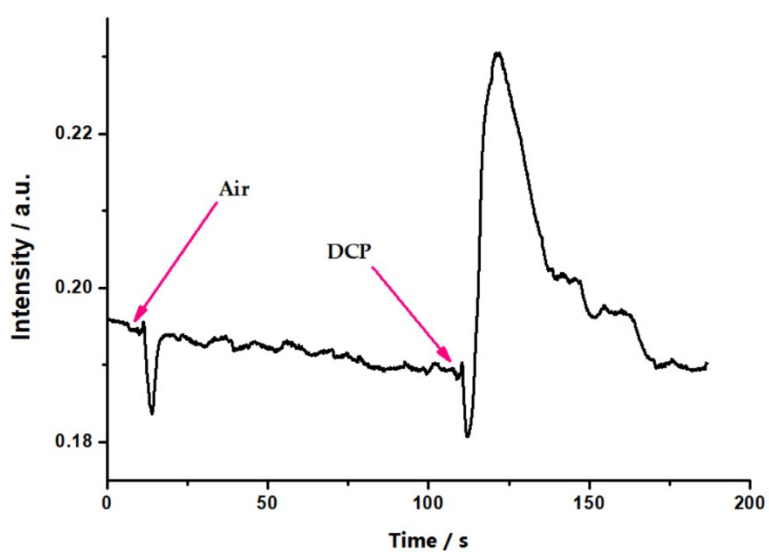

Fig. S4 Compare response of COWG sensor to air and  $26.32 \times 10^{-6}$  (volume fraction) of DCP vapor.

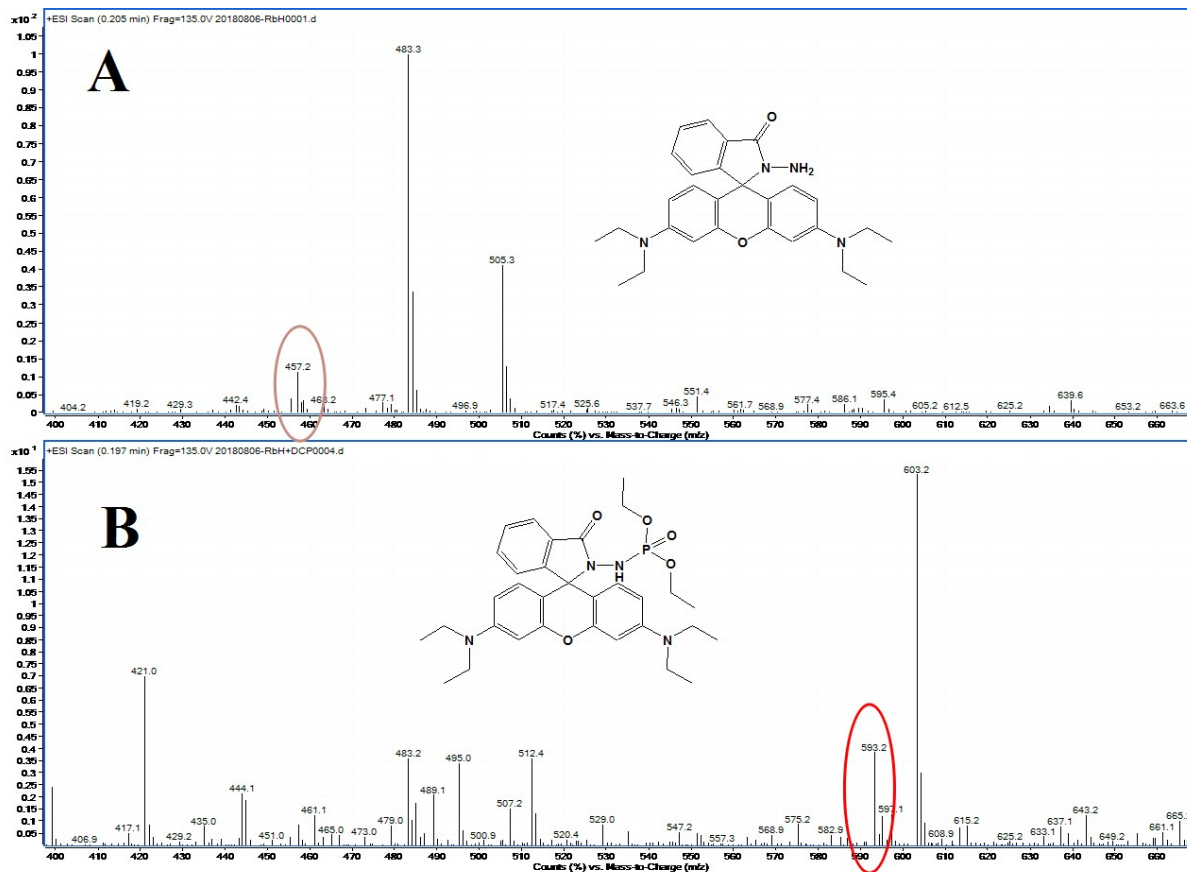

Fig. S5 Mass spectra of RbH and a mixture of RbH with DCP.  
 (a) RbH; (b) RbH-DCP.

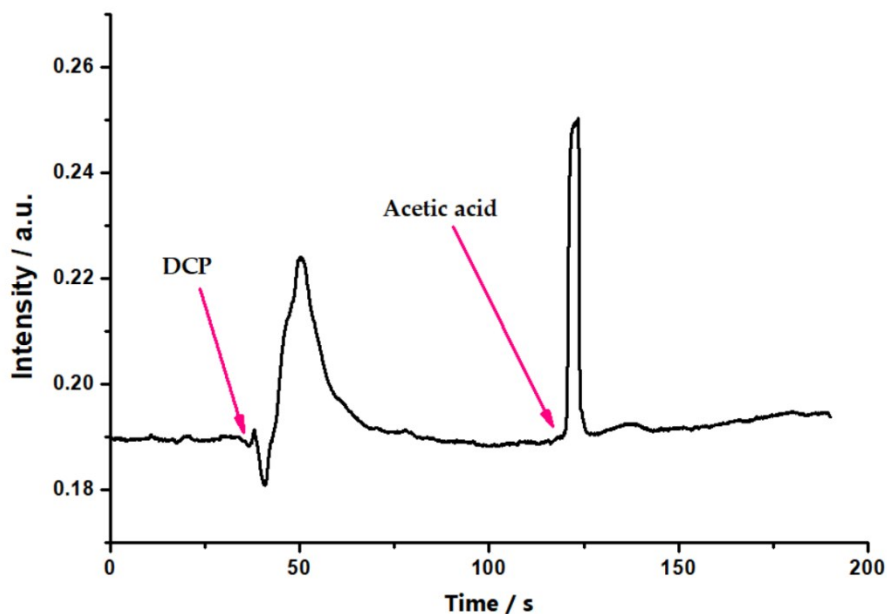

Fig. S6 Compare response of COWG sensor to  $26.32 \times 10^{-6}$  (volume fraction) of DCP vapor and saturated steam of acetic acid.
